# Supplementary material
Source: Springer Nature journal article supplement (https://www.springermedizin.de/resource/supplementary/13049_2009_81_MOESM1_ESM.pdf/9665844)
Supplement: MOESM1 [file 9665844]

**106 patients admitted with  
severe pelvic fracture**

**No angiography  
77 patients**

**Angiography  
29 patients**

**Embolization for active  
bleeding  
20 patients**

**Angiographies only  
9 patients**

**4 patients died**

**1 patient died**

**1 patient died**
